# Supplementary material for: The Impact of Anaemia on Outcomes, Admissions, and Costs in Patients with Chronic Kidney Disease in Two Public Nephrology Practices in Queensland: A CKD.QLD Registry Study
Source: Hindawi journal article supplement (doi:10.1155/2023/8720293), 2023-05-03
Supplement: f1 [file 8720293.f1.pdf]

Supplementary Table S1 – Principle diagnosis category for hospital admissions ( ICD-10-AM)

| Diagnosis category                                                                                  | n (%)            |
|-----------------------------------------------------------------------------------------------------|------------------|
| Diseases of the circulatory system                                                                  | 1877 (12.8)      |
| Factors influencing health status and contact with health services                                  | 1617 (11.1)      |
| Symptoms, signs and abnormal clinical and laboratory findings, not elsewhere classified             | 1223 (8.4)       |
| Neoplasms                                                                                           | 1152 (7.9)       |
| Diseases of the genitourinary system                                                                | 1144 (7.8)       |
| Diseases of the respiratory system                                                                  | 974 (6.7)        |
| Endocrine, nutritional and metabolic diseases                                                       | 931 (6.4)        |
| Injury, poisoning and certain other consequences of external causes                                 | 925 (6.3)        |
| Diseases of the digestive system                                                                    | 918 (6.3)        |
| <i>GI bleeding</i>                                                                                  | <i>360 (2.5)</i> |
| Diseases of the blood and blood-forming organs and certain disorders involving the immune mechanism | 822 (5.6)        |
| Diseases of the musculoskeletal system and connective tissue                                        | 796 (5.4)        |
| Diseases of the eye and adnexa                                                                      | 761 (5.2)        |
| Diseases of the nervous system                                                                      | 373 (2.5)        |
| Certain infectious and parasitic diseases                                                           | 341 (2.3)        |
| Diseases of the skin and subcutaneous tissue                                                        | 309 (2.1)        |
| Mental and behavioral disorders                                                                     | 250 (1.7)        |
| Pregnancy, childbirth and puerperium                                                                | 117 (0.8)        |
| Diseases of the ear and mastoid process                                                             | 81 (0.6)         |
| Congenital malformations, deformations and chromosomal abnormalities                                | 19 (0.1)         |
| Certain conditions originating in the perinatal period                                              | 0                |
| External causes of morbidity and mortality                                                          | 0                |
| Codes for special purposes                                                                          | 0                |

Supplementary Table S2. Causes of death by ICD10 diagnosis category

|                                                                                                          | N   | %    |
|----------------------------------------------------------------------------------------------------------|-----|------|
| Diseases of the circulatory system                                                                       | 187 | 35.8 |
| Neoplasms                                                                                                | 89  | 17.0 |
| Endocrine, nutritional and metabolic diseases                                                            | 68  | 13.0 |
| Diseases of the genitourinary system                                                                     | 59  | 11.3 |
| Diseases of the respiratory system                                                                       | 46  | 8.8  |
| Diseases of the digestive system                                                                         | 16  | 3.1  |
| Certain infectious and parasitic diseases                                                                | 15  | 2.9  |
| Other                                                                                                    | 12  | 2.3  |
| Mental and behavioral disorders                                                                          | 10  | 1.9  |
| Diseases of the musculoskeletal system and connective tissue                                             | 9   | 1.7  |
| Diseases of the nervous system                                                                           | 7   | 1.3  |
| Congenital malformations, deformations and chromosomal abnormalities                                     | 2   | 0.4  |
| Diseases of the blood and blood formation organs and certain disorders<br>Involving the immune mechanism | 2   | 0.4  |
| Diseases of the skin and subcutaneous tissue                                                             | 1   | 0.2  |
| Total deaths                                                                                             | 523 |      |
